# Supplementary material for: Microstructure and thermoelectric transport properties of BiCuSeO thin films on amorphous glass substrates
Source: Royal Society of Chemistry journal article supplement (doi:10.1039/c8dt02026d), 2018-01-01
Supplement: c8dt02026d1.pdf [file c8dt02026d1.pdf]

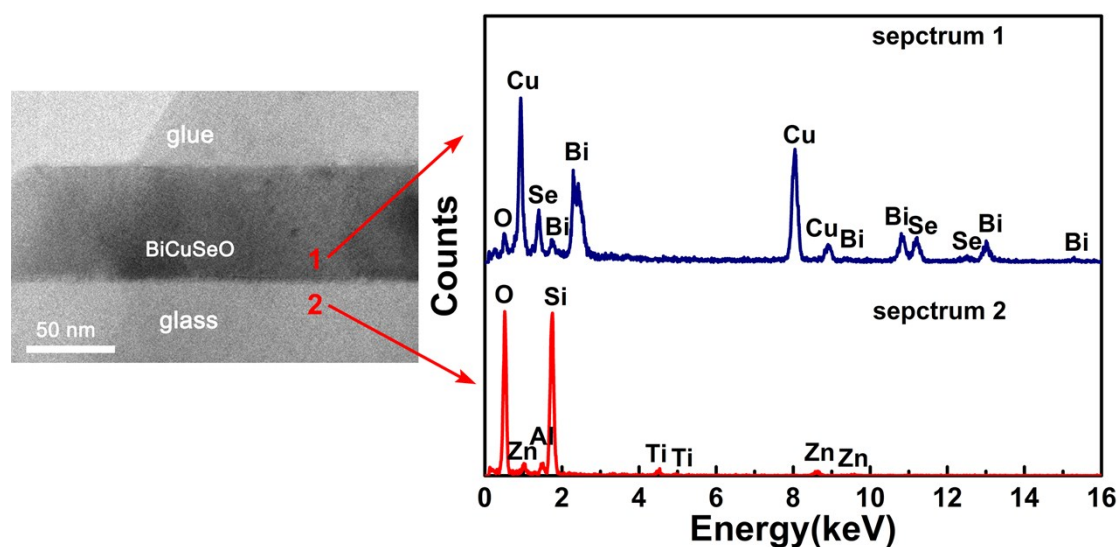

Figure 1 Cross-sectional TEM/EDX analysis of the sample at the interface between the glass substrate and the BiCuSeO film.

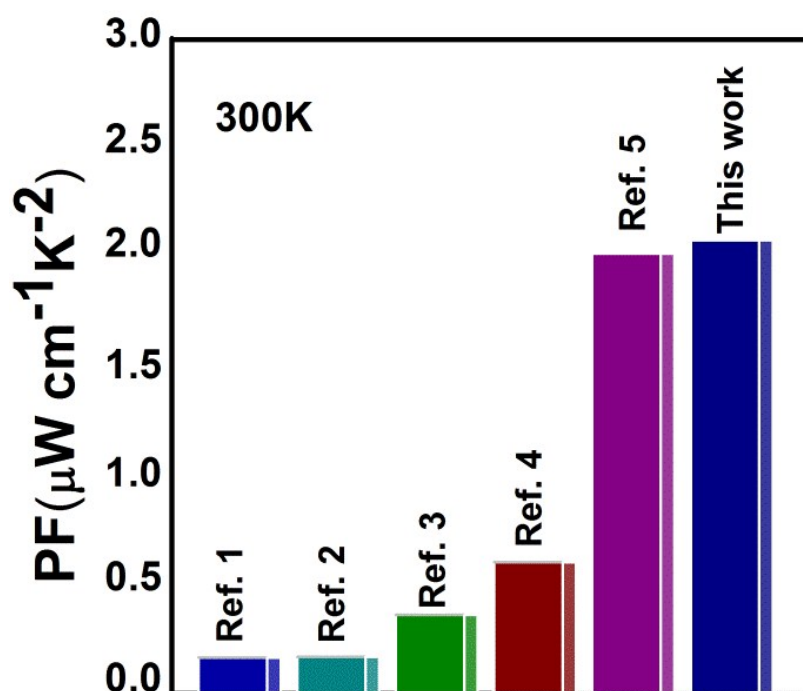

Figure 2 Comparison of power factor  $PF$  of the BiCuSeO thin film to that of bulk polycrystalline samples reported in Ref.1-5.

Table 1 Comparison of power factor  $PF$  of the BiCuSeO thin film to that of bulk polycrystalline samples with the carrier concentration in the same order as the film

| Sample                                                 | n                    | $\mu$                                       | PF                                    | Ref.                                |
|--------------------------------------------------------|----------------------|---------------------------------------------|---------------------------------------|-------------------------------------|
|                                                        | ( $\text{cm}^{-3}$ ) | ( $\text{cm}^2\text{V}^{-1}\text{s}^{-1}$ ) | ( $\mu\text{WK}^{-2}\text{cm}^{-1}$ ) |                                     |
| BiCuSeO thin film                                      | $1.1 \times 10^{20}$ | 1.5                                         | 1.73                                  | This work                           |
| $\text{Bi}_{0.09}\text{Pb}_{0.01}\text{CuSeO}$ bulks   | $1.2 \times 10^{20}$ | 3.3                                         | 3.40                                  | Appl. Phys. Lett. 2013, 102, 023902 |
| $\text{Bi}_{0.975}\text{Ca}_{0.025}\text{CuSeO}$ bulks | $1.5 \times 10^{20}$ | 3.2                                         | 2.40                                  | J. Mater. Chem. A, 2013, 1, 11942   |
| $\text{Bi}_{0.95}\text{Ca}_{0.05}\text{CuSeO}$ bulks   | $1.0 \times 10^{20}$ | 6.0                                         | 1.20                                  | NPG Asia Mater. 2013, 5, 47         |
| $\text{Bi}_{0.9}\text{Sn}_{0.1}\text{CuSeO}$ bulks     | $1.3 \times 10^{20}$ | 2.3                                         | 1.30                                  | Dalton Trans. 2017, 46, 2510        |
| $\text{Bi}_{0.92}\text{Sb}_{0.08}\text{CuSeO}$ bulks   | $8.6 \times 10^{19}$ | 1.3                                         | 0.04                                  | J. Alloy. Compound. 2017, 712, 386  |
